# Supplementary material for: Ultra-Rapid Lispro Improves Postprandial Glucose Control and Time in Range in Type 1 Diabetes Compared to Lispro: PRONTO-T1D Continuous Glucose Monitoring Substudy
Source: PubMed Central journal article supplement (PMC7698997; doi:10.1089/dia.2020.0129), 2020-11-09
Supplement: Supp_TableS3.pdf [file Supp_TableS3.pdf]

SUPPLEMENTARY TABLE S3. SUMMARY OF KEY GLYCEMIC CONTROL PARAMETERS IN THE CONTINUOUS GLUCOSE MONITORING COHORT VERSUS THE FULL STUDY POPULATION

|                                                                                                    | CGM cohort                  |                           |                           | Full study population        |                            |                            |
|----------------------------------------------------------------------------------------------------|-----------------------------|---------------------------|---------------------------|------------------------------|----------------------------|----------------------------|
|                                                                                                    | Mealtime lispro<br>(N = 99) | Mealtime URLi<br>(N = 97) | Postmeal URLi<br>(N = 73) | Mealtime lispro<br>(N = 442) | Mealtime URLi<br>(N = 451) | Postmeal URLi<br>(N = 329) |
| Hypoglycemia incidence ( $\leq 70$ mg/dL [3.9 mmol/L]), <i>n</i> (%) from randomization to week 26 |                             |                           |                           |                              |                            |                            |
| Documented symptomatic                                                                             | 92 (92.93)                  | 92 (94.85)                | 66 (90.41)                | 404 (91.40)                  | 414 (91.80)                | 293 (89.06)                |
| All documented                                                                                     | 99 (100.00)                 | 97 (100.00)               | 72 (98.63)                | 440 (99.55)                  | 449 (99.56)                | 325 (98.78)                |
| Non-nocturnal                                                                                      | 93 (93.94)                  | 94 (96.91)                | 70 (95.89)                | 421 (95.25)                  | 433 (96.01)                | 311 (94.53)                |
| Nocturnal                                                                                          | 79 (79.80)                  | 78 (80.41)                | 57 (78.08)                | 328 (74.21)                  | 344 (76.27)                | 251 (76.29)                |
| Hypoglycemia rate (events/patient/30 days), ( $\leq 70$ mg/dL [3.9 mmol/L]), LSM (SE) at week 26   |                             |                           |                           |                              |                            |                            |
| Documented symptomatic                                                                             | 4.93 (0.53)                 | 5.51 (0.59)               | 5.62 (0.61)               | 4.94 (0.26)                  | 4.70 (0.24)                | 4.93 (0.27)                |
| All documented                                                                                     | 8.33 (0.56)                 | 8.83 (0.68)               | 9.01 (0.71)               | 8.14 (0.29)                  | 7.54 (0.27)                | 8.16 (0.31)                |
| Non-nocturnal                                                                                      | 5.98 (0.49)                 | 6.45 (0.62)               | 6.77 (0.62)               | 5.75 (0.25)                  | 5.20 (0.23)                | 5.92 (0.28)*               |
| Nocturnal                                                                                          | 1.17 (0.17)                 | 1.17 (0.15)               | 1.01 (0.15)               | 1.16 (0.09)                  | 1.11 (0.08)                | 1.03 (0.08)                |
| Insulin dose (U/kg), LSM (SE) at week 26                                                           |                             |                           |                           |                              |                            |                            |
| Basal <sup>‡</sup>                                                                                 | 0.39 (0.01)                 | 0.38 (0.01)               | 0.38 (0.01)               | 0.37 (0.00)                  | 0.38 (0.00)                | 0.38 (0.00)                |
| Bolus                                                                                              | 0.45 (0.02)                 | 0.44 (0.02)               | 0.44 (0.02)               | 0.41 (0.01)                  | 0.43 (0.01)                | 0.42 (0.01)                |
| Total                                                                                              | 0.84 (0.02)                 | 0.84 (0.02)               | 0.82 (0.02)               | 0.79 (0.01)                  | 0.81 (0.01)                | 0.80 (0.01)                |
| HbA1c (%), LSM (SE)                                                                                |                             |                           |                           |                              |                            |                            |
| Baseline                                                                                           | 7.28 (0.07)                 | 7.24 (0.07)               | 7.24 (0.08)               | 7.33 (0.03)                  | 7.34 (0.03)                | 7.36 (0.04)                |
| Week 26                                                                                            | 7.12 (0.06)                 | 7.15 (0.06)               | 7.35 (0.06)* <sup>†</sup> | 7.29 (0.03)                  | 7.21 (0.03)                | 7.42 (0.04)* <sup>†</sup>  |
| Change at week 26                                                                                  | -0.13 (0.06)                | -0.11 (0.06)              | 0.10 (0.06)               | -0.05 (0.03)                 | -0.13 (0.03)               | 0.08 (0.04)                |
| HbA1c (mmol/mol), LSM (SE)                                                                         |                             |                           |                           |                              |                            |                            |
| Baseline                                                                                           | 56.0 (0.72)                 | 55.6 (0.73)               | 55.7 (0.83)               | 56.7 (0.34)                  | 56.7 (0.34)                | 56.9 (0.40)                |
| Week 26                                                                                            | 54.4 (0.63)                 | 54.6 (0.64)               | 56.8 (0.70)* <sup>†</sup> | 56.1 (0.34)                  | 55.3 (0.33)                | 57.6 (0.39)* <sup>†</sup>  |
| Change at week 26                                                                                  | -1.4 (0.63)                 | -1.2 (0.64)               | 1.0 (0.70)                | -0.6 (0.34)                  | -1.4 (0.33)                | 0.8 (0.39)                 |

\* $P < 0.05$  postmeal URLi versus mealtime URLi.

<sup>†</sup> $P < 0.05$  postmeal URLi versus mealtime lispro.

<sup>‡</sup>Patients were stratified according to basal insulin use during the study. In the main study cohort, formal treatment-by-subgroup interactions analyses were performed for type of basal insulin. No significant treatment by subgroup interactions were identified in analyses of HbA1c or hypoglycemia rate.

LSM, least squares mean; SE, standard error.
